# Supplementary material
Source: PubMed Central journal article supplement (PMC10403729)

**A**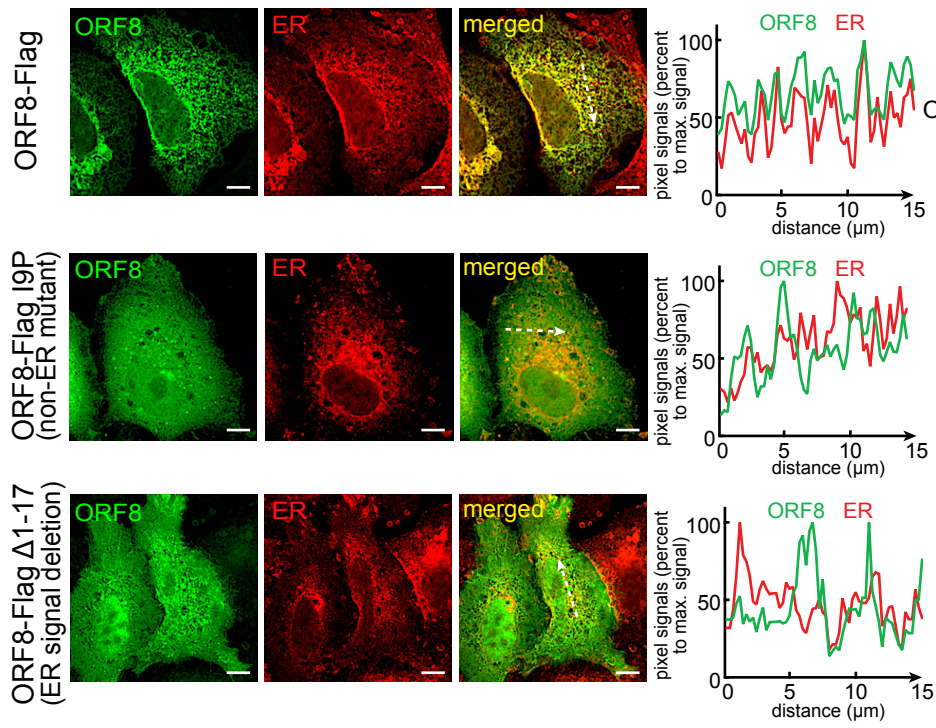**B**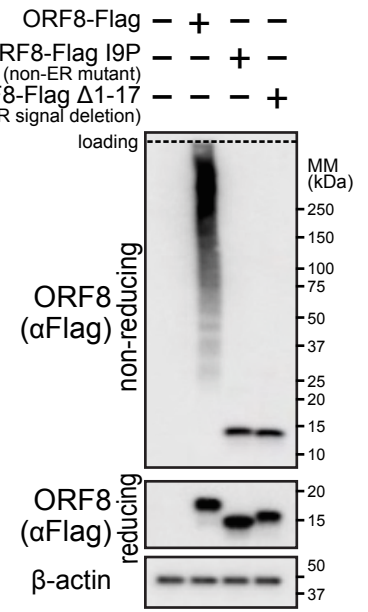

Supplement: mmc3.pdf [file mmc3.pdf]
