# Supplementary material
Source: PubMed Central journal article supplement (PMC10403729)

**A**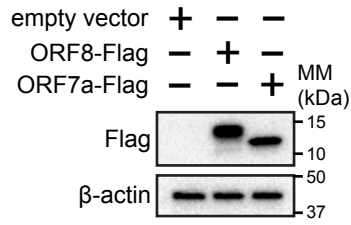**B**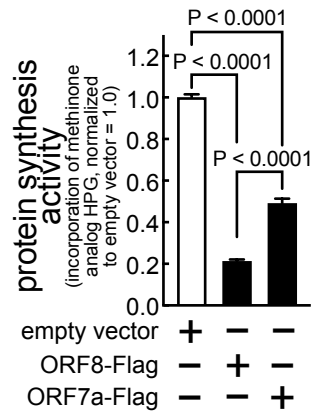**C**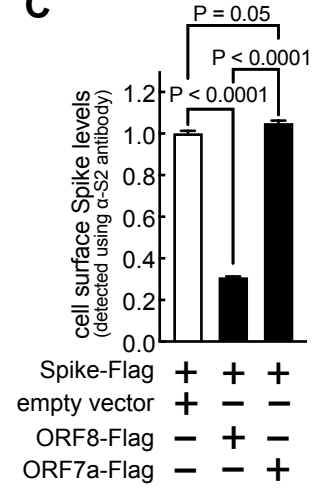**D**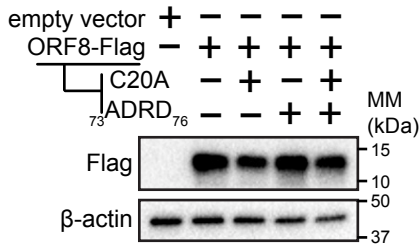**E**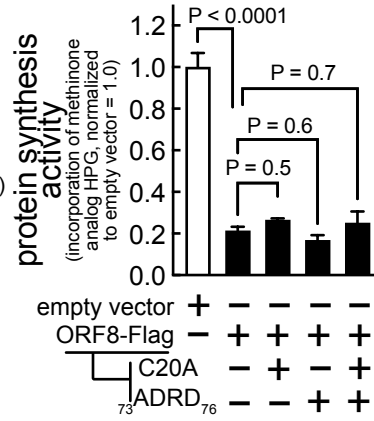**F**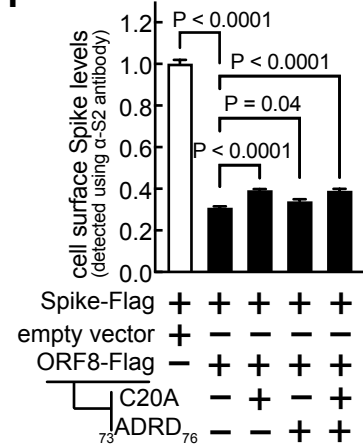

Supplement: mmc4.pdf [file mmc4.pdf]
